# Supplementary material for: Tracking Protests Using Geotagged Flickr Photographs
Source: PubMed Central journal article supplement (PMC4773018; doi:10.1371/journal.pone.0150466), 2016-03-01
Supplement: pone.0150466.s001.pdf [file pone.0150466.s001.pdf]

**S1 Table. List of the country and region names as used in the analyses.**

---

|                                     |                             |                                   |
|-------------------------------------|-----------------------------|-----------------------------------|
| Afghanistan                         | Aland                       | Albania                           |
| Algeria                             | American Samoa              | Andorra                           |
| Angola                              | Anguilla                    | Antarctica                        |
| Antigua and Barbuda                 | Argentina                   | Armenia                           |
| Aruba                               | Ashmore and Cartier Islands | Australia                         |
| Austria                             | Azerbaijan                  | Bahrain                           |
| Bangladesh                          | Barbados                    | Belarus                           |
| Belgium                             | Belize                      | Benin                             |
| Bermuda                             | Bhutan                      | Bolivia                           |
| Bosnia and Herzegovina              | Botswana                    | Brazil                            |
| British Indian Ocean Territory      | British Virgin Islands      | Brunei                            |
| Bulgaria                            | Burkina Faso                | Burundi                           |
| Cambodia                            | Cameroon                    | Canada                            |
| Cape Verde                          | Cayman Islands              | Central African Republic          |
| Chad                                | Chile                       | China                             |
| Colombia                            | Comoros                     | Cook Islands                      |
| Costa Rica                          | Croatia                     | Cuba                              |
| Curacao                             | Cyprus                      | Czech Republic                    |
| Democratic Republic of the Congo    | Denmark                     | Djibouti                          |
| Dominica                            | Dominican Republic          | East Timor                        |
| Ecuador                             | Egypt                       | El Salvador                       |
| Equatorial Guinea                   | Eritrea                     | Estonia                           |
| Ethiopia                            | Falkland Islands            | Faroe Islands                     |
| Federated States of Micronesia      | Fiji                        | Finland                           |
| France                              | French Guiana               | French Polynesia                  |
| French Southern and Antarctic Lands | Gabon                       | Gambia                            |
| Gaza                                | Georgia                     | Germany                           |
| Ghana                               | Greece                      | Greenland                         |
| Grenada                             | Guam                        | Guatemala                         |
| Guernsey                            | Guinea                      | Guinea Bissau                     |
| Guyana                              | Haiti                       | Heard Island and McDonald Islands |
| Honduras                            | Hong Kong S.A.R.            | Hungary                           |
| Iceland                             | India                       | Indian Ocean Territories          |
| Indonesia                           | Iran                        | Iraq                              |
| Ireland                             | Isle of Man                 | Israel                            |
| Italy                               | Ivory Coast                 | Jamaica                           |
| Japan                               | Jersey                      | Jordan                            |
| Kazakhstan                          | Kenya                       | Kiribati                          |
| Kosovo                              | Kuwait                      | Kyrgyzstan                        |
| Laos                                | Latvia                      | Lebanon                           |
| Lesotho                             | Liberia                     | Libya                             |
| Liechtenstein                       | Lithuania                   | Luxembourg                        |
| Macau S.A.R                         | Macedonia                   | Madagascar                        |
| Malawi                              | Malaysia                    | Maldives                          |
| Mali                                | Malta                       | Marshall Islands                  |
| Mauritania                          | Mauritius                   | Mexico                            |
| Moldova                             | Monaco                      | Mongolia                          |
| Montenegro                          | Montserrat                  | Morocco                           |
| Mozambique                          | Myanmar                     | Namibia                           |

---

|                             |                                          |                                  |
|-----------------------------|------------------------------------------|----------------------------------|
| Nauru                       | Nepal                                    | Netherlands                      |
| New Caledonia               | New Zealand                              | Nicaragua                        |
| Niger                       | Nigeria                                  | Niue                             |
| Norfolk Island              | Northern Cyprus                          | Northern Mariana Islands         |
| North Korea                 | Norway                                   | Oman                             |
| Pakistan                    | Palau                                    | Panama                           |
| Papua New Guinea            | Paraguay                                 | Peru                             |
| Philippines                 | Pitcairn Islands                         | Poland                           |
| Portugal                    | Puerto Rico                              | Qatar                            |
| Republic of Serbia          | Republic of the Congo                    | Romania                          |
| Russia                      | Rwanda                                   | Saint Barthelemy                 |
| Saint Helena                | Saint Kitts and Nevis                    | Saint Lucia                      |
| Saint Martin                | Saint Pierre and Miquelon                | Saint Vincent and the Grenadines |
| Samoa                       | San Marino                               | Sao Tome and Principe            |
| Saudi Arabia                | Senegal                                  | Seychelles                       |
| Siachen Glacier             | Sierra Leone                             | Singapore                        |
| Sint Maarten                | Slovakia                                 | Slovenia                         |
| Solomon Islands             | Somalia                                  | Somaliland                       |
| South Africa                | South Georgia and South Sandwich Islands | South Korea                      |
| South Sudan                 | Spain                                    | Sri Lanka                        |
| Sudan                       | Suriname                                 | Swaziland                        |
| Sweden                      | Switzerland                              | Syria                            |
| Taiwan                      | Tajikistan                               | Thailand                         |
| The Bahamas                 | Togo                                     | Tonga                            |
| Trinidad and Tobago         | Tunisia                                  | Turkey                           |
| Turkmenistan                | Turks and Caicos Islands                 | Tuvalu                           |
| Uganda                      | Ukraine                                  | United Arab Emirates             |
| United Republic of Tanzania | United States Virgin Islands             | Uruguay                          |
| Uzbekistan                  | Vanuatu                                  | Vatican                          |
| Venezuela                   | Vietnam                                  | Wallis and Futuna                |
| West Bank                   | Western Sahara                           | Yemen                            |
| Zambia                      | Zimbabwe                                 |                                  |

---
