# Supplementary material for: Tracking Protests Using Geotagged Flickr Photographs
Source: PubMed Central journal article supplement (PMC4773018; doi:10.1371/journal.pone.0150466), 2016-03-01
Supplement: pone.0150466.s002.pdf [file pone.0150466.s002.pdf]

**S2 Table.** List of translations of the word 'protest' in different languages.

---

| <b>Protest Keyword</b> | <b>Language</b> |
|------------------------|-----------------|
| احتجاج                 | Arabic          |
| Protesta               | Austrian        |
| Протест                | Bulgarian       |
| Protest                | Czech           |
| Protest                | German          |
| Protest                | Estonian        |
| Protesta               | Basque          |
| اعتراض                 | Persian         |
| Protesta               | Galician        |
| 항의                     | Korean          |
| Mótæði                 | Icelandic       |
| Contestazione          | Italian         |
| האמנ                   | Hebrew          |
| ಪಪಟನನ                  | Kannada         |
| Қарсылық қозғалысы     | Kazakh          |
| Protestas              | Lithuanian      |
| Протест                | Macedonian      |
| Bantahan               | Malay           |
| Protest                | Dutch           |
| 反对運動                   | Japanese        |
| Protesto               | Portuguese      |
| Protest                | Romanian        |
| Протест                | Russian         |
| Protest                | Simple English  |
| Protest                | Slovak          |
| Protest                | Serbo-Croatian  |
| Protesti               | Finnish         |
| Protest                | Swedish         |
| எதிர்ப்பு              | Tamil           |
| การประท้วง             | Thai            |
| Protesto               | Turkish         |
| Протест                | Ukranian        |
| פּראָטעסט              | Yiddish         |
| 抗議                     | Chinese         |

---
