# Supplementary material for: Tracking Protests Using Geotagged Flickr Photographs
Source: PubMed Central journal article supplement (PMC4773018; doi:10.1371/journal.pone.0150466), 2016-03-01
Supplement: pone.0150466.s003.pdf [file pone.0150466.s003.pdf]

**S3 Table. List of the total number of *Flickr* photographs per country and region.**

|    | Country and Region             | Photographs |
|----|--------------------------------|-------------|
| 1  | Afghanistan                    | 734         |
| 2  | Aland                          | 436         |
| 3  | Albania                        | 2,121       |
| 4  | Algeria                        | 1,419       |
| 5  | American Samoa                 | 60          |
| 6  | Andorra                        | 1,577       |
| 7  | Angola                         | 290         |
| 8  | Anguilla                       | 76          |
| 9  | Antarctica                     | 701         |
| 10 | Antigua and Barbuda            | 1,065       |
| 11 | Argentina                      | 49,670      |
| 12 | Armenia                        | 1,165       |
| 13 | Aruba                          | 346         |
| 14 | Ashmore and Cartier Islands    | 0           |
| 15 | Australia                      | 324,903     |
| 16 | Austria                        | 103,291     |
| 17 | Azerbaijan                     | 1,039       |
| 18 | Bahrain                        | 2,278       |
| 19 | Bangladesh                     | 5,679       |
| 20 | Barbados                       | 678         |
| 21 | Belarus                        | 5,187       |
| 22 | Belgium                        | 104,520     |
| 23 | Belize                         | 887         |
| 24 | Benin                          | 164         |
| 25 | Bermuda                        | 524         |
| 26 | Bhutan                         | 206         |
| 27 | Bolivia                        | 4,288       |
| 28 | Bosnia and Herzegovina         | 2,134       |
| 29 | Botswana                       | 860         |
| 30 | Brazil                         | 336,260     |
| 31 | British Indian Ocean Territory | 16          |
| 32 | British Virgin Islands         | 123         |
| 33 | Brunei                         | 2,377       |
| 34 | Bulgaria                       | 8,580       |
| 35 | Burkina Faso                   | 292         |
| 36 | Burundi                        | 197         |
| 37 | Cambodia                       | 12,672      |
| 38 | Cameroon                       | 373         |
| 39 | Canada                         | 404,408     |
| 40 | Cape Verde                     | 620         |
| 41 | Cayman Islands                 | 986         |
| 42 | Central African Republic       | 91          |
| 43 | Chad                           | 77          |
| 44 | Chile                          | 63,386      |
| 45 | China                          | 149,705     |
| 46 | Colombia                       | 34,793      |
| 47 | Comoros                        | 10          |
| 48 | Cook Islands                   | 40          |
| 49 | Costa Rica                     | 12,221      |
| 50 | Croatia                        | 9,979       |

|     | Country Name                        | Pictures |
|-----|-------------------------------------|----------|
| 51  | Cuba                                | 2,701    |
| 52  | Curacao                             | 792      |
| 53  | Cyprus                              | 5,366    |
| 54  | Czech Republic                      | 65,739   |
| 55  | Democratic Republic of the Congo    | 562      |
| 56  | Denmark                             | 43,290   |
| 57  | Djibouti                            | 246      |
| 58  | Dominica                            | 75       |
| 59  | Dominican Republic                  | 7,477    |
| 60  | East Timor                          | 329      |
| 61  | Ecuador                             | 11,058   |
| 62  | Egypt                               | 12,849   |
| 63  | El Salvador                         | 2,412    |
| 64  | Equatorial Guinea                   | 20       |
| 65  | Eritrea                             | 23       |
| 66  | Estonia                             | 10,811   |
| 67  | Ethiopia                            | 1,474    |
| 68  | Falkland Islands                    | 269      |
| 69  | Faroe Islands                       | 592      |
| 70  | Federated States of Micronesia      | 48       |
| 71  | Fiji                                | 163      |
| 72  | Finland                             | 55,050   |
| 73  | France                              | 493,813  |
| 74  | French Guiana                       | 880      |
| 75  | French Polynesia                    | 871      |
| 76  | French Southern and Antarctic Lands | 0        |
| 77  | Gabon                               | 128      |
| 78  | Gambia                              | 399      |
| 79  | Gaza                                | 702      |
| 80  | Georgia                             | 4,751    |
| 81  | Germany                             | 494,288  |
| 82  | Ghana                               | 754      |
| 83  | Greece                              | 42,367   |
| 84  | Greenland                           | 484      |
| 85  | Grenada                             | 84       |
| 86  | Guam                                | 1,777    |
| 87  | Guatemala                           | 5,772    |
| 88  | Guernsey                            | 2,090    |
| 89  | Guinea                              | 243      |
| 90  | Guinea Bissau                       | 7        |
| 91  | Guyana                              | 600      |
| 92  | Haiti                               | 1,016    |
| 93  | Heard Island and McDonald Islands   | 0        |
| 94  | Honduras                            | 2,082    |
| 95  | Hong Kong S.A.R.                    | 58,471   |
| 96  | Hungary                             | 41,437   |
| 97  | Iceland                             | 15,565   |
| 98  | India                               | 67,407   |
| 99  | Indian Ocean Territories            | 21       |
| 100 | Indonesia                           | 58,313   |

|     | Country Name     | Pictures |
|-----|------------------|----------|
| 101 | Iran             | 3,354    |
| 102 | Iraq             | 5,505    |
| 103 | Ireland          | 94,009   |
| 104 | Isle of Man      | 3,874    |
| 105 | Israel           | 35,847   |
| 106 | Italy            | 492,311  |
| 107 | Ivory Coast      | 117      |
| 108 | Jamaica          | 1,879    |
| 109 | Japan            | 480,205  |
| 110 | Jersey           | 2,035    |
| 111 | Jordan           | 8,619    |
| 112 | Kazakhstan       | 2,757    |
| 113 | Kenya            | 4,793    |
| 114 | Kiribati         | 7        |
| 115 | Kosovo           | 793      |
| 116 | Kuwait           | 10,300   |
| 117 | Kyrgyzstan       | 836      |
| 118 | Laos             | 3,931    |
| 119 | Latvia           | 9,534    |
| 120 | Lebanon          | 3,243    |
| 121 | Lesotho          | 76       |
| 122 | Liberia          | 57       |
| 123 | Libya            | 577      |
| 124 | Liechtenstein    | 292      |
| 125 | Lithuania        | 4,706    |
| 126 | Luxembourg       | 4,138    |
| 127 | Macau S.A.R      | 36       |
| 128 | Macedonia        | 1,536    |
| 129 | Madagascar       | 1,575    |
| 130 | Malawi           | 465      |
| 131 | Malaysia         | 65,237   |
| 132 | Maldives         | 680      |
| 133 | Mali             | 197      |
| 134 | Malta            | 4,760    |
| 135 | Marshall Islands | 0        |
| 136 | Mauritania       | 220      |
| 137 | Mauritius        | 2,188    |
| 138 | Mexico           | 118,988  |
| 139 | Moldova          | 834      |
| 140 | Monaco           | 80       |
| 141 | Mongolia         | 1,909    |
| 142 | Montenegro       | 2,310    |
| 143 | Montserrat       | 37       |
| 144 | Morocco          | 10,613   |
| 145 | Mozambique       | 1,141    |
| 146 | Myanmar          | 5,769    |
| 147 | Namibia          | 783      |
| 148 | Nauru            | 11       |
| 149 | Nepal            | 4,525    |
| 150 | Netherlands      | 262,659  |

|     | Country Name                     | Pictures |
|-----|----------------------------------|----------|
| 151 | New Caledonia                    | 415      |
| 152 | New Zealand                      | 62,590   |
| 153 | Nicaragua                        | 2,319    |
| 154 | Niger                            | 80       |
| 155 | Nigeria                          | 552      |
| 156 | Niue                             | 6        |
| 157 | Norfolk Island                   | 235      |
| 158 | North Korea                      | 1,206    |
| 159 | Northern Cyprus                  | 1,550    |
| 160 | Northern Mariana Islands         | 225      |
| 161 | Norway                           | 64,758   |
| 162 | Oman                             | 2,935    |
| 163 | Pakistan                         | 6,258    |
| 164 | Palau                            | 48       |
| 165 | Panama                           | 5,693    |
| 166 | Papua New Guinea                 | 279      |
| 167 | Paraguay                         | 1,897    |
| 168 | Peru                             | 21,277   |
| 169 | Philippines                      | 70,957   |
| 170 | Pitcairn Islands                 | 2        |
| 171 | Poland                           | 55,780   |
| 172 | Portugal                         | 57,766   |
| 173 | Puerto Rico                      | 8,591    |
| 174 | Qatar                            | 9,963    |
| 175 | Republic of Serbia               | 9,368    |
| 176 | Republic of the Congo            | 128      |
| 177 | Romania                          | 22,819   |
| 178 | Russia                           | 124,744  |
| 179 | Rwanda                           | 950      |
| 180 | Saint Barthelemy                 | 67       |
| 181 | Saint Helena                     | 170      |
| 182 | Saint Kitts and Nevis            | 295      |
| 183 | Saint Lucia                      | 214      |
| 184 | Saint Martin                     | 258      |
| 185 | Saint Pierre and Miquelon        | 35       |
| 186 | Saint Vincent and the Grenadines | 50       |
| 187 | Samoa                            | 25       |
| 188 | San Marino                       | 609      |
| 189 | Sao Tome and Principe            | 105      |
| 190 | Saudi Arabia                     | 17,735   |
| 191 | Senegal                          | 978      |
| 192 | Seychelles                       | 261      |
| 193 | Siachen Glacier                  | 0        |
| 194 | Sierra Leone                     | 70       |
| 195 | Singapore                        | 64,376   |
| 196 | Sint Maarten                     | 1,131    |
| 197 | Slovakia                         | 13,811   |
| 198 | Slovenia                         | 8,673    |
| 199 | Solomon Islands                  | 143      |
| 200 | Somalia                          | 14       |

|     | Country Name                             | Pictures  |
|-----|------------------------------------------|-----------|
| 201 | Somaliland                               | 25        |
| 202 | South Africa                             | 28,101    |
| 203 | South Georgia and South Sandwich Islands | 33        |
| 204 | South Korea                              | 121,170   |
| 205 | South Sudan                              | 60        |
| 206 | Spain                                    | 490,356   |
| 207 | Sri Lanka                                | 6,128     |
| 208 | Sudan                                    | 950       |
| 209 | Suriname                                 | 444       |
| 210 | Swaziland                                | 387       |
| 211 | Sweden                                   | 82,758    |
| 212 | Switzerland                              | 127,250   |
| 213 | Syria                                    | 2,016     |
| 214 | Taiwan                                   | 394,698   |
| 215 | Tajikistan                               | 191       |
| 216 | Thailand                                 | 90,141    |
| 217 | The Bahamas                              | 733       |
| 218 | Togo                                     | 116       |
| 219 | Tonga                                    | 28        |
| 220 | Trinidad and Tobago                      | 2,824     |
| 221 | Tunisia                                  | 3,328     |
| 222 | Turkey                                   | 38,437    |
| 223 | Turkmenistan                             | 25        |
| 224 | Turks and Caicos Islands                 | 355       |
| 225 | Tuvalu                                   | 0         |
| 226 | Uganda                                   | 995       |
| 227 | Ukraine                                  | 27,198    |
| 228 | United Arab Emirates                     | 20,948    |
| 229 | United Kingdom                           | 1,890,670 |
| 230 | United Republic of Tanzania              | 4,822     |
| 231 | United States of America                 | 3,812,116 |
| 232 | United States Virgin Islands             | 1,275     |
| 233 | Uruguay                                  | 6,617     |
| 234 | Uzbekistan                               | 881       |
| 235 | Vanuatu                                  | 193       |
| 236 | Vatican                                  | 0         |
| 237 | Venezuela                                | 16,865    |
| 238 | Vietnam                                  | 53,333    |
| 239 | Wallis and Futuna                        | 1         |
| 240 | West Bank                                | 8,854     |
| 241 | Western Sahara                           | 41        |
| 242 | Yemen                                    | 357       |
| 243 | Zambia                                   | 1,311     |
| 244 | Zimbabwe                                 | 478       |
