# Supplementary material for: Tracking Protests Using Geotagged Flickr Photographs
Source: PubMed Central journal article supplement (PMC4773018; doi:10.1371/journal.pone.0150466), 2016-03-01
Supplement: pone.0150466.s004.pdf [file pone.0150466.s004.pdf]

**S4 Table. List of the total number of *The Guardian* news articles per country and region.**

|    | Country and Region             | Total |
|----|--------------------------------|-------|
| 1  | Afghanistan                    | 2,212 |
| 2  | Aland                          | 0     |
| 3  | Albania                        | 142   |
| 4  | Algeria                        | 412   |
| 5  | American Samoa                 | 23    |
| 6  | Andorra                        | 60    |
| 7  | Angola                         | 169   |
| 8  | Anguilla                       | 24    |
| 9  | Antarctica                     | 268   |
| 10 | Antigua and Barbuda            | 8     |
| 11 | Argentina                      | 1,255 |
| 12 | Armenia                        | 105   |
| 13 | Aruba                          | 16    |
| 14 | Ashmore and Cartier Islands    | 0     |
| 15 | Australia                      | 8,430 |
| 16 | Austria                        | 729   |
| 17 | Azerbaijan                     | 126   |
| 18 | Bahrain                        | 322   |
| 19 | Bangladesh                     | 808   |
| 20 | Barbados                       | 115   |
| 21 | Belarus                        | 235   |
| 22 | Belgium                        | 1,070 |
| 23 | Belize                         | 86    |
| 24 | Benin                          | 89    |
| 25 | Bermuda                        | 120   |
| 26 | Bhutan                         | 68    |
| 27 | Bolivia                        | 282   |
| 28 | Bosnia and Herzegovina         | 46    |
| 29 | Botswana                       | 124   |
| 30 | Brazil                         | 3,076 |
| 31 | British Indian Ocean Territory | 7     |
| 32 | British Virgin Islands         | 95    |
| 33 | Brunei                         | 67    |
| 34 | Bulgaria                       | 452   |
| 35 | Burkina Faso                   | 176   |
| 36 | Burundi                        | 90    |
| 37 | Cambodia                       | 319   |
| 38 | Cameroon                       | 208   |
| 39 | Canada                         | 2,621 |
| 40 | Cape Verde                     | 55    |
| 41 | Cayman Islands                 | 94    |
| 42 | Central African Republic       | 160   |
| 43 | Chad                           | 245   |
| 44 | Chile                          | 687   |
| 45 | China                          | 5,871 |
| 46 | Colombia                       | 503   |
| 47 | Comoros                        | 21    |
| 48 | Cook Islands                   | 34    |
| 49 | Costa Rica                     | 274   |
| 50 | Croatia                        | 438   |

|     | Country                             | Total |
|-----|-------------------------------------|-------|
| 51  | Cuba                                | 527   |
| 52  | Curacao                             | 9     |
| 53  | Cyprus                              | 829   |
| 54  | Czech Republic                      | 387   |
| 55  | Democratic Republic of the Congo    | 215   |
| 56  | Denmark                             | 928   |
| 57  | Djibouti                            | 37    |
| 58  | Dominica                            | 17    |
| 59  | Dominican Republic                  | 97    |
| 60  | East Timor                          | 39    |
| 61  | Ecuador                             | 379   |
| 62  | Egypt                               | 1,770 |
| 63  | El Salvador                         | 133   |
| 64  | Equatorial Guinea                   | 54    |
| 65  | Eritrea                             | 65    |
| 66  | Estonia                             | 210   |
| 67  | Ethiopia                            | 470   |
| 68  | Falkland Islands                    | 120   |
| 69  | Faroe Islands                       | 55    |
| 70  | Federated States of Micronesia      | 2     |
| 71  | Fiji                                | 194   |
| 72  | Finland                             | 613   |
| 73  | France                              | 7,242 |
| 74  | French Guiana                       | 24    |
| 75  | French Polynesia                    | 9     |
| 76  | French Southern and Antarctic Lands | 0     |
| 77  | Gabon                               | 86    |
| 78  | Gambia                              | 79    |
| 79  | Gaza                                | 520   |
| 80  | Georgia                             | 688   |
| 81  | Germany                             | 5,569 |
| 82  | Ghana                               | 546   |
| 83  | Greece                              | 1,620 |
| 84  | Greenland                           | 149   |
| 85  | Grenada                             | 48    |
| 86  | Guam                                | 42    |
| 87  | Guatemala                           | 212   |
| 88  | Guernsey                            | 95    |
| 89  | Guinea                              | 622   |
| 90  | Guinea Bissau                       | 37    |
| 91  | Guyana                              | 61    |
| 92  | Haiti                               | 270   |
| 93  | Heard Island and McDonald Islands   | 2     |
| 94  | Honduras                            | 188   |
| 95  | Hong Kong S.A.R.                    | 0     |
| 96  | Hungary                             | 469   |
| 97  | Iceland                             | 634   |
| 98  | India                               | 4,354 |
| 99  | Indian Ocean Territories            | 0     |
| 100 | Indonesia                           | 1,167 |

|     | Country          | Total |
|-----|------------------|-------|
| 101 | Iran             | 1,873 |
| 102 | Iraq             | 2,398 |
| 103 | Ireland          | 4,979 |
| 104 | Isle of Man      | 136   |
| 105 | Israel           | 2,151 |
| 106 | Italy            | 3,970 |
| 107 | Ivory Coast      | 279   |
| 108 | Jamaica          | 378   |
| 109 | Japan            | 2,796 |
| 110 | Jersey           | 1,419 |
| 111 | Jordan           | 1,675 |
| 112 | Kazakhstan       | 297   |
| 113 | Kenya            | 1,134 |
| 114 | Kiribati         | 25    |
| 115 | Kosovo           | 169   |
| 116 | Kuwait           | 250   |
| 117 | Kyrgyzstan       | 69    |
| 118 | Laos             | 99    |
| 119 | Latvia           | 221   |
| 120 | Lebanon          | 641   |
| 121 | Lesotho          | 58    |
| 122 | Liberia          | 201   |
| 123 | Libya            | 885   |
| 124 | Liechtenstein    | 77    |
| 125 | Lithuania        | 223   |
| 126 | Luxembourg       | 378   |
| 127 | Macau S.A.R      | 0     |
| 128 | Macedonia        | 128   |
| 129 | Madagascar       | 144   |
| 130 | Malawi           | 209   |
| 131 | Malaysia         | 565   |
| 132 | Maldives         | 74    |
| 133 | Mali             | 790   |
| 134 | Malta            | 233   |
| 135 | Marshall Islands | 19    |
| 136 | Mauritania       | 71    |
| 137 | Mauritius        | 116   |
| 138 | Mexico           | 1,743 |
| 139 | Moldova          | 210   |
| 140 | Monaco           | 501   |
| 141 | Mongolia         | 138   |
| 142 | Montenegro       | 322   |
| 143 | Montserrat       | 26    |
| 144 | Morocco          | 317   |
| 145 | Mozambique       | 201   |
| 146 | Myanmar          | 106   |
| 147 | Namibia          | 119   |
| 148 | Nauru            | 147   |
| 149 | Nepal            | 365   |
| 150 | Netherlands      | 1,376 |

|     | Country                          | Total |
|-----|----------------------------------|-------|
| 151 | New Caledonia                    | 30    |
| 152 | New Zealand                      | 2,477 |
| 153 | Nicaragua                        | 154   |
| 154 | Niger                            | 249   |
| 155 | Nigeria                          | 935   |
| 156 | Niue                             | 6     |
| 157 | Norfolk Island                   | 4     |
| 158 | Northern Cyprus                  | 18    |
| 159 | Northern Mariana Islands         | 3     |
| 160 | North Korea                      | 725   |
| 161 | Norway                           | 1,070 |
| 162 | Oman                             | 136   |
| 163 | Pakistan                         | 1,758 |
| 164 | Palau                            | 40    |
| 165 | Panama                           | 248   |
| 166 | Papua New Guinea                 | 296   |
| 167 | Paraguay                         | 126   |
| 168 | Peru                             | 442   |
| 169 | Philippines                      | 816   |
| 170 | Pitcairn Islands                 | 0     |
| 171 | Poland                           | 1,155 |
| 172 | Portugal                         | 1,153 |
| 173 | Puerto Rico                      | 65    |
| 174 | Qatar                            | 796   |
| 175 | Republic of Serbia               | 0     |
| 176 | Republic of the Congo            | 220   |
| 177 | Romania                          | 660   |
| 178 | Russia                           | 3,699 |
| 179 | Rwanda                           | 359   |
| 180 | Saint Barthelemy                 | 0     |
| 181 | Saint Helena                     | 6     |
| 182 | Saint Kitts and Nevis            | 5     |
| 183 | Saint Lucia                      | 10    |
| 184 | Saint Martin                     | 18    |
| 185 | Saint Pierre and Miquelon        | 2     |
| 186 | Saint Vincent and the Grenadines | 5     |
| 187 | Samoa                            | 136   |
| 188 | San Marino                       | 184   |
| 189 | Sao Tome and Principe            | 4     |
| 190 | Saudi Arabia                     | 749   |
| 191 | Senegal                          | 254   |
| 192 | Seychelles                       | 43    |
| 193 | Siachen Glacier                  | 0     |
| 194 | Sierra Leone                     | 226   |
| 195 | Singapore                        | 801   |
| 196 | Sint Maarten                     | 7     |
| 197 | Slovakia                         | 194   |
| 198 | Slovenia                         | 239   |
| 199 | Solomon Islands                  | 41    |
| 200 | Somalia                          | 612   |

|     | Country                                  | Total  |
|-----|------------------------------------------|--------|
| 201 | Somaliland                               | 43     |
| 202 | South Africa                             | 2,766  |
| 203 | South Georgia and South Sandwich Islands | 1      |
| 204 | South Korea                              | 877    |
| 205 | South Sudan                              | 187    |
| 206 | Spain                                    | 3,877  |
| 207 | Sri Lanka                                | 641    |
| 208 | Sudan                                    | 414    |
| 209 | Suriname                                 | 34     |
| 210 | Swaziland                                | 42     |
| 211 | Sweden                                   | 1,467  |
| 212 | Switzerland                              | 1,216  |
| 213 | Syria                                    | 2,860  |
| 214 | Taiwan                                   | 293    |
| 215 | Tajikistan                               | 38     |
| 216 | Thailand                                 | 689    |
| 217 | The Bahamas                              | 87     |
| 218 | Togo                                     | 113    |
| 219 | Tonga                                    | 103    |
| 220 | Trinidad and Tobago                      | 56     |
| 221 | Tunisia                                  | 338    |
| 222 | Turkey                                   | 1,953  |
| 223 | Turkmenistan                             | 46     |
| 224 | Turks and Caicos Islands                 | 22     |
| 225 | Tuvalu                                   | 24     |
| 226 | Uganda                                   | 532    |
| 227 | Ukraine                                  | 747    |
| 228 | United Arab Emirates                     | 247    |
| 229 | United Kingdom                           | 29,106 |
| 230 | United Republic of Tanzania              | 5      |
| 231 | United States of America                 | 3,148  |
| 232 | United States Virgin Islands             | 0      |
| 233 | Uruguay                                  | 463    |
| 234 | Uzbekistan                               | 112    |
| 235 | Vanuatu                                  | 31     |
| 236 | Vatican                                  | 632    |
| 237 | Venezuela                                | 454    |
| 238 | Vietnam                                  | 911    |
| 239 | Wallis and Futuna                        | 3      |
| 240 | West Bank                                | 484    |
| 241 | Western Sahara                           | 20     |
| 242 | Yemen                                    | 467    |
| 243 | Zambia                                   | 249    |
| 244 | Zimbabwe                                 | 413    |
